# Supplementary material
Source: Springer Nature journal article supplement (https://www.springermedizin.de/resource/supplementary/13256_2008_1114_MOESM2_ESM.pdf/9647036)

**A****Cv**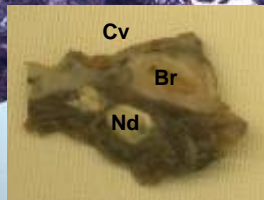**Br**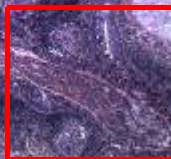**H&E 25X****B****GC****CT****GC****BE**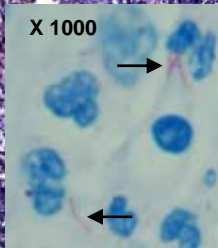**BE****H&E 100X**

Supplement: MOESM2 [file 9647036]
